# Supplementary material for: Modeling the stability of severe acute respiratory syndrome coronavirus 2 (SARS-CoV-2) on skin, currency, and clothing
Source: PubMed Central journal article supplement (PMC7676723; doi:10.1371/journal.pntd.0008831), 2020-11-09
Supplement: pntd.0008831.s001.pdf [file pntd.0008831.s001.pdf]

Supplementary Figure 1. Geometric mean ratio of half-lives, averaged across all three temperatures.

| Effect      | Temperatures Compared |      | Ratio of Half-Lives | p-value          |
|-------------|-----------------------|------|---------------------|------------------|
| Temperature | 4°C                   | 22°C | 20.35               | <b>&lt;.0001</b> |
| Temperature | 4°C                   | 37°C | 73.14               | <b>&lt;.0001</b> |
| Temperature | 22°C                  | 37°C | 3.59                | <b>&lt;.0001</b> |
